# Supplementary material for: Gastro-oesophageal reflux and worse asthma control in obese children: a case of symptom misattribution?
Source: HighWire-hosted journal article supplement (doi:10.1136/thoraxjnl-2015-207662), 2016-02-01

## Supplement Figures

Figure E1 Impulse oscillometry among lean, overweight and obese adolescents measured by respiratory system resistance (A) and reactance (B). Error bars denote standard deviations. No differences were seen based on body habitus at any hertz.

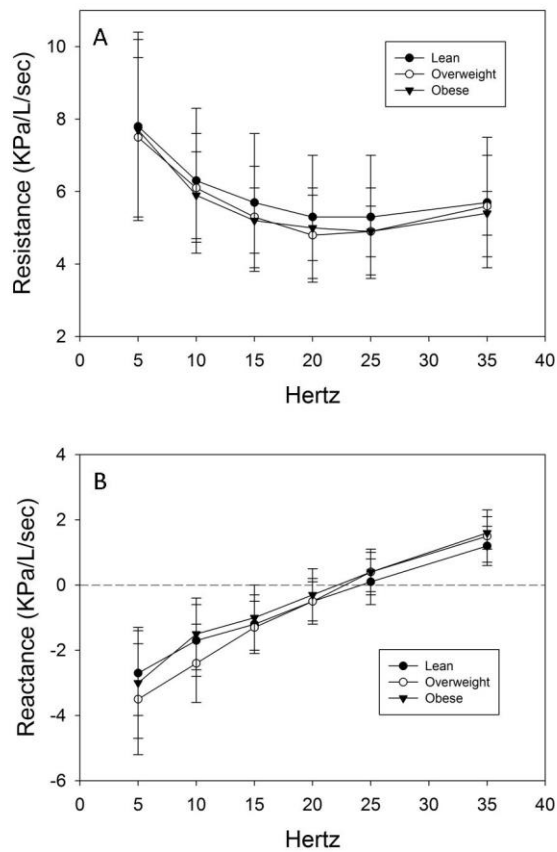

Supplement: thoraxjnl-2015-207662supp_figures.pdf [file thoraxjnl-2015-207662supp_figures.pdf]
