# Supplementary material for: Gastro-oesophageal reflux and worse asthma control in obese children: a case of symptom misattribution?
Source: HighWire-hosted journal article supplement (doi:10.1136/thoraxjnl-2015-207662), 2016-02-01
Supplement: thoraxjnl-2015-207662supp_tables.pdf [file thoraxjnl-2015-207662supp_tables.pdf]

| Table E1: Patient Characteristics by GSAQ Score Tertiles                                                                                                                                                                                                                                                                                                                                                                                                                                            |               |             |             |         |
|-----------------------------------------------------------------------------------------------------------------------------------------------------------------------------------------------------------------------------------------------------------------------------------------------------------------------------------------------------------------------------------------------------------------------------------------------------------------------------------------------------|---------------|-------------|-------------|---------|
| Variables, mean (SD)                                                                                                                                                                                                                                                                                                                                                                                                                                                                                | GSAQ Tertiles |             |             | p-value |
|                                                                                                                                                                                                                                                                                                                                                                                                                                                                                                     | T1            | T2          | T3          |         |
| n                                                                                                                                                                                                                                                                                                                                                                                                                                                                                                   | 124           | 74          | 108         |         |
| GER Score range                                                                                                                                                                                                                                                                                                                                                                                                                                                                                     | 0-4           | 6-15        | 16-223      |         |
| Female, n (%)                                                                                                                                                                                                                                                                                                                                                                                                                                                                                       | 42 (34)       | 27 (36)     | 49 (45)     | .184    |
| Race, n (%)                                                                                                                                                                                                                                                                                                                                                                                                                                                                                         |               |             |             | .191    |
| White                                                                                                                                                                                                                                                                                                                                                                                                                                                                                               | 45 (36)       | 26 (35)     | 47 (44)     |         |
| Black                                                                                                                                                                                                                                                                                                                                                                                                                                                                                               | 64 (52)       | 38 (51)     | 51 (47)     |         |
| Other                                                                                                                                                                                                                                                                                                                                                                                                                                                                                               | 15 (12)       | 10 (14)     | 10 (9)      |         |
| Hispanic/Latino, n (%)                                                                                                                                                                                                                                                                                                                                                                                                                                                                              | 25 (20)       | 11 (15)     | 17 (16)     | .571    |
| Birth weight < 2.5 kg, n (%)                                                                                                                                                                                                                                                                                                                                                                                                                                                                        | 12 (10)       | 3 (4)       | 3 (3)       | .078    |
| Age of asthma diagnosis, years                                                                                                                                                                                                                                                                                                                                                                                                                                                                      | 3.1 (2.8)     | 3.5 (3.2)   | 3.6 (3.5)   | .194C   |
| BMI ≥95 <sup>th</sup> percentile, n (%) <sup>C</sup>                                                                                                                                                                                                                                                                                                                                                                                                                                                | 38 (31)       | 21 (28)     | 35 (32)     | .846    |
| Anthropometric measures <sup>T</sup>                                                                                                                                                                                                                                                                                                                                                                                                                                                                |               |             |             | .225    |
| BMI-percentile                                                                                                                                                                                                                                                                                                                                                                                                                                                                                      | 75.5 (25.8)   | 68.4 (30.1) | 72.9 (29.0) |         |
| Environment                                                                                                                                                                                                                                                                                                                                                                                                                                                                                         |               |             |             | .928    |
| ETS exposure at home, n (%)                                                                                                                                                                                                                                                                                                                                                                                                                                                                         | 21 (17)       | 14 (19)     | 19 (18)     |         |
| Co-morbidities                                                                                                                                                                                                                                                                                                                                                                                                                                                                                      |               |             |             |         |
| GER disease                                                                                                                                                                                                                                                                                                                                                                                                                                                                                         | 0 (0)         | 0 (0)       | 0 (0)       | --      |
| Allergic rhinitis                                                                                                                                                                                                                                                                                                                                                                                                                                                                                   | 68 (55)       | 51 (69)     | 62 (57)     | .130    |
| Neuropsychiatric disorder                                                                                                                                                                                                                                                                                                                                                                                                                                                                           | 0 (0)         | 0 (0)       | 0 (0)       | --      |
| Controller treatments, n (%)                                                                                                                                                                                                                                                                                                                                                                                                                                                                        |               |             |             |         |
| ICS-LABA                                                                                                                                                                                                                                                                                                                                                                                                                                                                                            | 75 (60)       | 48 (65)     | 51 (47)     | .035    |
| LTRA                                                                                                                                                                                                                                                                                                                                                                                                                                                                                                | 69 (56)       | 32 (43)     | 60 (56)     | .514    |
| Utilization for Asthma                                                                                                                                                                                                                                                                                                                                                                                                                                                                              |               |             |             |         |
| Urgent care visits in past year                                                                                                                                                                                                                                                                                                                                                                                                                                                                     | 2.3 (2.6)     | 3.0 (3.4)   | 3.4 (5.4)   | .042T   |
| Steroid bursts in past year                                                                                                                                                                                                                                                                                                                                                                                                                                                                         | 1.6 (1.6)     | 2.0 (2.3)   | 1.8 (2.1)   | .377    |
| Values are means (SD) unless noted, SD – standard deviation, GSAQ – GERD symptom assessment questionnaire, GERD – gastroesophageal reflux disease, BMI – body mass index, ETS – environmental tobacco smoke, IQR – intraquartile range, ICS – inhaled corticosteroids, LABA – long acting Beta-agonists, LTRA – leukotriene receptor antagonist, T - ANOVA test for linear trend used for continuous variables, C - Cochran-Armitage Trend test for categorical variables, K – Kruskal-Wallis test. |               |             |             |         |

| Table E2a: Correlation Coefficients between Asthma and GSAQ score subscales in Obese Children (BMI $\geq$ 95 <sup>th</sup> percentile) |                                      |                                                                                                                                                                                                                                                                                                                                                                                                                                                                                                                                                                                                                                                                                                                                                                                                                                                                                                                                                                                                                                                                                                                                                                                                                                                                                                                                                                                                                                       |                               |                                      |                                      |                   |                  |                    |                |                |
|----------------------------------------------------------------------------------------------------------------------------------------|--------------------------------------|---------------------------------------------------------------------------------------------------------------------------------------------------------------------------------------------------------------------------------------------------------------------------------------------------------------------------------------------------------------------------------------------------------------------------------------------------------------------------------------------------------------------------------------------------------------------------------------------------------------------------------------------------------------------------------------------------------------------------------------------------------------------------------------------------------------------------------------------------------------------------------------------------------------------------------------------------------------------------------------------------------------------------------------------------------------------------------------------------------------------------------------------------------------------------------------------------------------------------------------------------------------------------------------------------------------------------------------------------------------------------------------------------------------------------------------|-------------------------------|--------------------------------------|--------------------------------------|-------------------|------------------|--------------------|----------------|----------------|
|                                                                                                                                        | ACQ                                  | Woken                                                                                                                                                                                                                                                                                                                                                                                                                                                                                                                                                                                                                                                                                                                                                                                                                                                                                                                                                                                                                                                                                                                                                                                                                                                                                                                                                                                                                                 | morning                       | activities                           | SOB                                  | Wheeze            | SABA             | FEV1               | FEV1%          | FEV1/FVC       |
| GER score                                                                                                                              | <b>.474</b><br>( <b>&lt;.0001</b> )  | 0.325<br>(0.0013)                                                                                                                                                                                                                                                                                                                                                                                                                                                                                                                                                                                                                                                                                                                                                                                                                                                                                                                                                                                                                                                                                                                                                                                                                                                                                                                                                                                                                     | 0.392<br>( <b>&lt;.0001</b> ) | <b>0.437</b><br>( <b>&lt;.0001</b> ) | <b>0.460</b><br>( <b>&lt;.0001</b> ) | 0.385<br>(0.0001) | .344<br>(0.0006) | -0.001<br>(0.9925) | .017<br>(.864) | .028<br>(.784) |
| Abdominal pain                                                                                                                         | 0.355<br>(0.0004)                    | Measures are Pearson's correlation coefficients (p-values), GSAQ – GERD symptoms assessment questionnaire, GERD – gastroesophageal reflux disease, ACQ – asthma control questionnaire score, FEV1% – Forced expiratory volume in 1 second (percent predicted), SOB – shortness of breath, SABA – short acting beta-agonist use, FEV1% – forced expiratory volume in 1 second percent predicted, FVC – forced vital capacity (liters), <b>Dark grey</b> boxes indicate p-value significance <0.01, Light grey boxes indicate p-value significance < 0.05. <b>BOLDED</b> values represent R values $\geq$ 0.400. Woken – “on average, during the past week, how often were you woken by your asthma during the night?” Morning – “on average, during the past week, how bad were your asthma symptoms when you woke up in the morning?” Activities – “In general, during the past week, how limited were you in your activities because of your asthma?” SOB – “In general, during the past week, how much shortness of breath did you experience because of your asthma?” Wheeze – “In general, during the past week, how much time did you wheeze?” SABA – “On average, during the past week, how many puffs/inhalations of short-acting bronchodilator have you used each day? FEV1 – FEV1 percent predicted subscale of ACQ represented by a 7-point ordinal scale, FEV1% - FEV1 percent predicted, FVC – forced expiratory volume. |                               |                                      |                                      |                   |                  |                    |                |                |
| Chest pain / heartburn                                                                                                                 | 0.259<br>(0.0112)                    |                                                                                                                                                                                                                                                                                                                                                                                                                                                                                                                                                                                                                                                                                                                                                                                                                                                                                                                                                                                                                                                                                                                                                                                                                                                                                                                                                                                                                                       |                               |                                      |                                      |                   |                  |                    |                |                |
| Difficulty swallowing                                                                                                                  | 0.288<br>(0.0046)                    |                                                                                                                                                                                                                                                                                                                                                                                                                                                                                                                                                                                                                                                                                                                                                                                                                                                                                                                                                                                                                                                                                                                                                                                                                                                                                                                                                                                                                                       |                               |                                      |                                      |                   |                  |                    |                |                |
| Night-time pain / awakening                                                                                                            | 0.307<br>(0.0025)                    |                                                                                                                                                                                                                                                                                                                                                                                                                                                                                                                                                                                                                                                                                                                                                                                                                                                                                                                                                                                                                                                                                                                                                                                                                                                                                                                                                                                                                                       |                               |                                      |                                      |                   |                  |                    |                |                |
| Nausea                                                                                                                                 | <b>0.439</b><br>( <b>&lt;.0001</b> ) |                                                                                                                                                                                                                                                                                                                                                                                                                                                                                                                                                                                                                                                                                                                                                                                                                                                                                                                                                                                                                                                                                                                                                                                                                                                                                                                                                                                                                                       |                               |                                      |                                      |                   |                  |                    |                |                |
| Vomiting / Regurgitation                                                                                                               | 0.150<br>(0.1467)                    |                                                                                                                                                                                                                                                                                                                                                                                                                                                                                                                                                                                                                                                                                                                                                                                                                                                                                                                                                                                                                                                                                                                                                                                                                                                                                                                                                                                                                                       |                               |                                      |                                      |                   |                  |                    |                |                |
| Burping / belching                                                                                                                     | .373<br>(.0002)                      |                                                                                                                                                                                                                                                                                                                                                                                                                                                                                                                                                                                                                                                                                                                                                                                                                                                                                                                                                                                                                                                                                                                                                                                                                                                                                                                                                                                                                                       |                               |                                      |                                      |                   |                  |                    |                |                |
| Choking when eating                                                                                                                    | .384<br>( <b>&lt;.0001</b> )         |                                                                                                                                                                                                                                                                                                                                                                                                                                                                                                                                                                                                                                                                                                                                                                                                                                                                                                                                                                                                                                                                                                                                                                                                                                                                                                                                                                                                                                       |                               |                                      |                                      |                   |                  |                    |                |                |
| Pain after eating                                                                                                                      | .238<br>(0.0201)                     |                                                                                                                                                                                                                                                                                                                                                                                                                                                                                                                                                                                                                                                                                                                                                                                                                                                                                                                                                                                                                                                                                                                                                                                                                                                                                                                                                                                                                                       |                               |                                      |                                      |                   |                  |                    |                |                |

| Table E2b: Correlation Coefficients between Asthma and GSAQ score subscales in Lean Children (BMI 20-65 <sup>th</sup> percentile) |                   |                                                                                                                                                                                                                                                                                                                                                                                                                                                                                                                                                                                                                                                                                                                                                                                                                                                                                                                                                                                                                                                                                                                                                                                                                                                                                                                                                                                                                                  |                                        |                     |                     |                     |                     |                      |                    |                    |
|-----------------------------------------------------------------------------------------------------------------------------------|-------------------|----------------------------------------------------------------------------------------------------------------------------------------------------------------------------------------------------------------------------------------------------------------------------------------------------------------------------------------------------------------------------------------------------------------------------------------------------------------------------------------------------------------------------------------------------------------------------------------------------------------------------------------------------------------------------------------------------------------------------------------------------------------------------------------------------------------------------------------------------------------------------------------------------------------------------------------------------------------------------------------------------------------------------------------------------------------------------------------------------------------------------------------------------------------------------------------------------------------------------------------------------------------------------------------------------------------------------------------------------------------------------------------------------------------------------------|----------------------------------------|---------------------|---------------------|---------------------|---------------------|----------------------|--------------------|--------------------|
|                                                                                                                                   | ACQ               | Woken                                                                                                                                                                                                                                                                                                                                                                                                                                                                                                                                                                                                                                                                                                                                                                                                                                                                                                                                                                                                                                                                                                                                                                                                                                                                                                                                                                                                                            | Morning                                | Activities          | SOB                 | Wheeze              | SABA                | FEV1                 | FEV1%              | FEV1/FVC           |
| GER score                                                                                                                         | 0.354<br>(0.0011) | 0.28866<br>(0.0085)                                                                                                                                                                                                                                                                                                                                                                                                                                                                                                                                                                                                                                                                                                                                                                                                                                                                                                                                                                                                                                                                                                                                                                                                                                                                                                                                                                                                              | <b>0.44623</b><br>( <b>&lt;.0001</b> ) | 0.24140<br>(0.0289) | 0.36542<br>(0.0007) | 0.22239<br>(0.0446) | 0.12055<br>(0.2807) | -0.04071<br>(0.7165) | 0.0508<br>(0.6143) | 0.1660<br>(0.0970) |
| Abdominal pain                                                                                                                    | 0.135<br>(0.2263) | Measures are Pearson's correlation coefficients (p-values), GSAQ – GERD symptoms assessment questionnaire, GERD – gastroesophageal reflux disease, ACQ – asthma control questionnaire score, FEV1% – Forced expiratory volume in 1 second (percent predicted), SOB – shortness of breath, SABA – short acting beta-agonist use, FEV1% – forced expiratory volume in 1 second percent predicted, FVC – forced vital capacity (liters), <b>Dark grey</b> boxes indicate p-value significance <0.01, Light grey boxes indicate p-value significance < 0.05. <b>BOLDED</b> values represent R values ≥ 0.400. Woken – “on average, during the past week, how often were you woken by your asthma during the night?” Morning – “on average, during the past week, how bad were your asthma symptoms when you woke up in the morning?” Activities – “In general, during the past week, how limited were you in your activities because of your asthma?” SOB – “In general, during the past week, how much shortness of breath did you experience because of your asthma?” Wheeze – “In general, during the past week, how much time did you wheeze?” SABA – “On average, during the past week, how many puffs/inhalations of short-acting bronchodilator have you used each day? FEV1 – FEV1 percent predicted subscale of ACQ represented by a 7-point ordinal scale, FEV1% - FEV1 percent predicted, FVC – forced expiratory volume. |                                        |                     |                     |                     |                     |                      |                    |                    |
| Chest pain / heartburn                                                                                                            | 0.254<br>(0.0211) |                                                                                                                                                                                                                                                                                                                                                                                                                                                                                                                                                                                                                                                                                                                                                                                                                                                                                                                                                                                                                                                                                                                                                                                                                                                                                                                                                                                                                                  |                                        |                     |                     |                     |                     |                      |                    |                    |
| Difficulty swallowing                                                                                                             | 0.179<br>(0.1076) |                                                                                                                                                                                                                                                                                                                                                                                                                                                                                                                                                                                                                                                                                                                                                                                                                                                                                                                                                                                                                                                                                                                                                                                                                                                                                                                                                                                                                                  |                                        |                     |                     |                     |                     |                      |                    |                    |
| Nausea                                                                                                                            | 0.217<br>(0.0506) |                                                                                                                                                                                                                                                                                                                                                                                                                                                                                                                                                                                                                                                                                                                                                                                                                                                                                                                                                                                                                                                                                                                                                                                                                                                                                                                                                                                                                                  |                                        |                     |                     |                     |                     |                      |                    |                    |
| Vomiting / Regurgitation                                                                                                          | 0.082<br>(0.4624) |                                                                                                                                                                                                                                                                                                                                                                                                                                                                                                                                                                                                                                                                                                                                                                                                                                                                                                                                                                                                                                                                                                                                                                                                                                                                                                                                                                                                                                  |                                        |                     |                     |                     |                     |                      |                    |                    |
| Burping / belching                                                                                                                | 0.072<br>(0.5224) |                                                                                                                                                                                                                                                                                                                                                                                                                                                                                                                                                                                                                                                                                                                                                                                                                                                                                                                                                                                                                                                                                                                                                                                                                                                                                                                                                                                                                                  |                                        |                     |                     |                     |                     |                      |                    |                    |
| Choking when eating                                                                                                               | 0.127<br>(0.2538) |                                                                                                                                                                                                                                                                                                                                                                                                                                                                                                                                                                                                                                                                                                                                                                                                                                                                                                                                                                                                                                                                                                                                                                                                                                                                                                                                                                                                                                  |                                        |                     |                     |                     |                     |                      |                    |                    |
| Pain after eating                                                                                                                 | 0.189<br>(0.0884) |                                                                                                                                                                                                                                                                                                                                                                                                                                                                                                                                                                                                                                                                                                                                                                                                                                                                                                                                                                                                                                                                                                                                                                                                                                                                                                                                                                                                                                  |                                        |                     |                     |                     |                     |                      |                    |                    |

| Table E3: Impulse Oscillometry Measures by BMI-percentile grouping                                                                          |                       |             |             | 103                  |
|---------------------------------------------------------------------------------------------------------------------------------------------|-----------------------|-------------|-------------|----------------------|
| Variables, mean (SD)                                                                                                                        | BMI-percentile groups |             |             | p-value <sup>T</sup> |
|                                                                                                                                             | 20-65%                | 85-94%      | 95-100%     |                      |
| n                                                                                                                                           | 21                    | 12          | 23          | 106                  |
| Impedance (KPa/L/sec), mean (SD)                                                                                                            |                       |             |             |                      |
| Z5                                                                                                                                          | 8.3 (2.8)             | 8.6 (2.5)   | 7.7 (2.1)   | .478                 |
| Resistance (KPa/L/sec), mean (SD)                                                                                                           |                       |             |             |                      |
| R5                                                                                                                                          | 7.8 (2.6)             | 7.5 (2.2)   | 7.7 (2.5)   | .851                 |
| R10                                                                                                                                         | 6.3 (2.0)             | 6.1 (1.5)   | 5.9 (1.2)   | .433                 |
| R15                                                                                                                                         | 5.7 (1.9)             | 5.3 (1.4)   | 5.2 (0.9)   | .314                 |
| R20                                                                                                                                         | 5.3 (1.7)             | 4.8 (1.3)   | 5.0 (0.9)   | .382                 |
| R25                                                                                                                                         | 5.3 (1.7)             | 4.9 (1.2)   | 4.9 (0.7)   | .339                 |
| R35                                                                                                                                         | 5.7 (1.8)             | 5.6 (1.4)   | 5.4 (0.6)   | .534                 |
| Reactance (KPa/L/sec) <sup>1</sup> , mean (SD)                                                                                              |                       |             |             |                      |
| X5                                                                                                                                          | -2.7 (1.3)            | -3.5 (1.7)  | -3.0 (1.7)  | .527                 |
| X10                                                                                                                                         | -1.7 (1.1)            | -2.4 (1.2)  | -1.5 (1.1)  | .715                 |
| X15                                                                                                                                         | -1.2 (0.9)            | -1.3 (0.8)  | -1.0 (1.0)  | .612                 |
| X20                                                                                                                                         | -0.5 (0.7)            | -0.5 (0.6)  | -0.3 (0.8)  | .309                 |
| X25                                                                                                                                         | 0.1 (0.7)             | 0.4 (0.7)   | 0.4 (0.6)   | .178                 |
| X35                                                                                                                                         | 1.2 (0.6)             | 1.5 (0.8)   | 1.6 (0.5)   | .053                 |
| AX (KPa/L)                                                                                                                                  | 25.0 (17.3)           | 29.4 (16.3) | 21.9 (16.9) | .558                 |
| F res (L/sec)                                                                                                                               | 23.5 (5.9)            | 23.9 (5.5)  | 20.9 (5.7)  | .159                 |
| SD – standard deviation, T – ANOVA test for linear trend, R – resistance, X – reactance, AX – area of reactance, F res – Resonant frequency |                       |             |             |                      |
